# Supplementary material
Source: PubMed Central journal article supplement (PMC4578998)
Supplement: NIHMS708293-supplement-Supp_TableS1-S2.pdf [file NIHMS708293-supplement-Supp_TableS1-S2.pdf]

**Supplemental Table 1: Clinicopathologic Characteristics of Patients Undergoing Local Treatment for PCa**

| Category                                  | N=1734 (%) | Metformin Use  |               | P-Value |
|-------------------------------------------|------------|----------------|---------------|---------|
|                                           |            | No N=1,368 (%) | Yes N=366 (%) |         |
| <b>Age (years)</b>                        |            | (%)            |               |         |
| <65                                       | 969 (56)   | 771 (56)       | 198 (54)      | 0.66    |
| 65-74                                     | 600 (35)   | 466 (34)       | 134 (37)      |         |
| 75+                                       | 165 (10)   | 131 (10)       | 34 (9)        |         |
| <b>Race</b>                               |            |                |               | 0.015   |
| White                                     | 1,467 (85) | 1,174 (86)     | 293 (80)      |         |
| Black                                     | 152 (9)    | 107 (8)        | 45 (12)       |         |
| Other                                     | 115 (7)    | 87 (6)         | 28 (8)        |         |
| <b>Body Mass Index (kg/m<sup>2</sup>)</b> |            |                |               | <0.001  |
| <24.9                                     | 297 (17)   | 262 (19)       | 35 (10)       |         |
| 25.0-29.9                                 | 710 (41)   | 611 (45)       | 99 (27)       |         |
| 30+                                       | 723 (42)   | 492 (36)       | 231 (63)      |         |
| <b>Charlson Score</b>                     |            |                |               | <0.001  |
| None                                      | 755 (44)   | 707 (53)       | 48 (13)       |         |
| 1                                         | 504 (30)   | 381 (28)       | 123 (34)      |         |
| 2-3                                       | 321 (19)   | 198 (15)       | 123 (34)      |         |
| 4+                                        | 126 (7)    | 59 (4)         | 67 (19)       |         |
| <b>Baseline PSA (ng/mL)</b>               |            |                |               | 0.009   |
| <4                                        | 146 (8)    | 105 (8)        | 41 (11)       |         |
| 4-9.9                                     | 1,093 (63) | 850 (62)       | 243 (66)      |         |
| 10-19.9                                   | 387 (22)   | 325 (24)       | 62 (17)       |         |
| 20+                                       | 108 (6)    | 88 (6)         | 20 (6)        |         |
| <b>Gleason Score</b>                      |            |                |               | 0.014   |
| 6                                         | 667 (39)   | 550 (40)       | 117 (32)      |         |
| 7                                         | 758 (44)   | 578 (42)       | 180 (49)      |         |
| 8-10                                      | 302 (18)   | 235 (17)       | 67 (18)       |         |
| <b>Clinical Stage</b>                     |            |                |               | 0.238   |
| T1-T2a                                    | 1,405 (25) | 1,103 (81)     | 302 (83)      |         |
| T2b-T2c                                   | 299 (17)   | 244 (18)       | 55 (15)       |         |
| T3+                                       | 30 (2)     | 21 (2)         | 9 (2)         |         |
| <b>D'Amico Risk Category</b>              |            |                |               | 0.782   |
| Low                                       | 433 (25)   | 346 (25)       | 87 (24)       |         |
| Intermediate                              | 914 (53)   | 720 (53)       | 194 (53)      |         |
| High                                      | 385 (22)   | 300 (22)       | 85 (23)       |         |

PCa: prostate cancer; kg/m<sup>2</sup>: kilograms per meters squared; PSA: prostate specific antigen; ng/mL: nanograms per milliliter.

**Supplemental Table 2: Demographics of Men Undergoing Prostate Needle Biopsy Relative to Metformin Usage**

|                                           | <b>Metformin</b> | <b>No Metformin</b> |
|-------------------------------------------|------------------|---------------------|
| <i>N</i>                                  | 48               | 42                  |
| <i>Age (years)</i>                        |                  |                     |
| <b>&lt; 60</b>                            | 6 (12.5)         | 5 (11.9)            |
| <b>60 – 69</b>                            | 31 (64.6)        | 29 (69)             |
| <b>• •</b>                                | 11 (22.9)        | 8 (19)              |
| <i>Race</i>                               |                  |                     |
| <b>Caucasian</b>                          | 39 (81.3)        | 35 (83.3)           |
| <b>African American</b>                   | 7 (14.6)         | 5 (11.9)            |
| <b>Other</b>                              | 2 (4.2)          | 2 (4.8)             |
| <i>Body Mass Index (kg/m<sup>2</sup>)</i> |                  |                     |
| <b>20 – 24</b>                            | 7 (14.6)         | 6 (14.3)            |
| <b>25 – 29</b>                            | 13 (27.1)        | 11 (26.2)           |
| <b>• •</b>                                | 28 (58.3)        | 25 (59.5)           |
| <i>PSA (ng/mL)</i>                        |                  |                     |
| <b>&lt; 4.0</b>                           | 8 (16.7)         | 8 (19)              |
| <b>4 – 9</b>                              | 33 (68.8)        | 26 (61.9)           |
| <b>• •</b>                                | 7 (14.6)         | 8 (19)              |
| <i>Family History of PCa</i>              |                  |                     |
| <b>No</b>                                 | 39 (81.3)        | 37 (88.1)           |
| <b>Yes</b>                                | 9 (18.8)         | 5 (11.9)            |
| <i>PCa on biopsy</i>                      |                  |                     |
| <b>No</b>                                 | 27 (56.3)        | 23 (54.8)           |
| <b>Yes</b>                                | 21 (43.8)        | 19 (45.2)           |
| <i>Fasting glucose</i>                    |                  |                     |
| <b>• • • • •</b>                          | 18 (37.5)        | 39 (92.9)           |
| <b>&gt; 125mg/dl</b>                      | 30 (62.5)        | 3 (7.1)             |

*BMI: body mass index; PCa: prostate cancer; kg/m<sup>2</sup>: kilograms per meters squared; ng/mL: nanograms per milliliter; mg/dL: milligrams per deciliter.*
